# Supplementary material for: Synthetic data for privacy-preserving clinical risk prediction
Source: bioRxiv or medRxiv preprint supplement (doi:10.1101/2023.05.18.23290114), 2023-05-24
Supplement: Supplementary file [file media-1.pdf]

# Synthetic data for privacy-preserving clinical risk prediction

Zhaozhi Qian<sup>1\*</sup>, Thomas Callender<sup>2\*</sup>, Bogdan Cebere<sup>1</sup>, Sam M Janes<sup>2</sup>, Neal Navani<sup>2</sup>, Mihaela van der Schaar<sup>1,3</sup>

<sup>1</sup> University of Cambridge, Cambridge, CB2 1TN, UK

<sup>2</sup> University College London, London, WC1E 6BT, UK

<sup>3</sup> The Alan Turing Institute, London, NW1 2DB, UK

\* These authors contributed equally.

## Appendix Tables

|   |                                                                                               |   |
|---|-----------------------------------------------------------------------------------------------|---|
| 1 | Candidate variables included in the synthetic data . . . . .                                  | 2 |
| 2 | Feature selection with real and synthetic datasets. . . . .                                   | 3 |
| 3 | Hyperparameter configurations of DeepHit identified from real and synthetic datasets. . . . . | 3 |

**Appendix Table 1.** Candidate variables included in the synthetic data

---

|                     |
|---------------------|
| Candidate variables |
|---------------------|

---

Age  
Sex  
Body mass index  
Ethnicity  
Highest qualification  
Age started smoking  
Age stopped smoking  
Smoking duration  
Years since stopped smoking  
Pack-years smoked  
Smoking status  
Asbestos exposure  
Personal history of asbestosis  
Personal history of pneumonia  
Personal history of COPD  
Personal history of Emphysema  
Personal history of chronic bronchitis  
Personal history of asthma  
Personal history of eczema, allergic rhinitis, or hayfever  
Personal history of cancer  
Number of previous cancers  
Family history of lung cancer (father)  
Family history of lung cancer (mother)  
Family history of lung cancer (siblings)

---

**Appendix Table 2.** Feature selection with real and synthetic datasets.

| Variable                                 | Real    | ADSGAN  | PATEGAN  | DPGAN    |
|------------------------------------------|---------|---------|----------|----------|
| Smoking duration (years)                 | 1.3E-58 | 7.5E-03 | 9.4E-271 | 1.2E-32  |
| Age                                      | 2.3E-50 | 1.7E-15 | 5.3E-159 | 6.0E-178 |
| Pack-years                               | 5.4E-29 | 5.1E-20 | 6.0E-09  | 0.0E+00  |
| Years since stopped smoking              | 1.8E-12 | 1.2E-36 | 4.2E-09  | 0.0E+00  |
| Current smoking status                   | 4.6E-11 | 5.9E-13 | 8.4E-05  | 1.3E-83  |
| Family history of lung cancer (father)   | 1.4E-07 | 9.2E-05 | 1.6E-03  | -        |
| Family history of lung cancer (siblings) | 5.0E-07 | 8.8E-09 | -        | -        |
| Highest qualifications - degree          | 3.0E-05 | -       | 3.2E-08  | 1.1E-110 |
| Highest qualification - other            | 2.0E-10 | 1.9E-04 | -        | 3.1E-03  |
| Body mass index                          | 3.7E-05 | 3.3E-66 | 1.5E-98  | 1.1E-57  |

P values of the top ten features calculated on different data sets. “-” indicates p value > 0.05.

**Appendix Table 3.** Hyperparameter configurations of DeepHit identified from real and synthetic datasets.

|         | $\alpha$ | $\sigma$ | Dropout | Batch size | Hidden dim | Learning rate | Patience |
|---------|----------|----------|---------|------------|------------|---------------|----------|
| Real    | 0.358    | 0.358    | 0.143   | 200        | 10         | 0.001         | 13       |
| ADSGAN  | 0.323    | 0.323    | 0.129   | 500        | 100        | 0.0001        | 29       |
| PATEGAN | 0.264    | 0.264    | 0.106   | 500        | 70         | 0.0001        | 34       |
| DPGAN   | 0.463    | 0.463    | 0.185   | 500        | 90         | 0.0001        | 11       |
